# Supplementary material for: Novel Data Analyses Explain the Birth-Cohort Phenomenon of Peptic Ulcers
Source: Preprints.org preprint supplement (doi:10.20944/preprints202302.0193.v1), 2023-02-13
Supplement: Supplementary file 1 [file supplementary]

**Online Supplemental Materials**

**Novel data analyses explain the birth-cohort phenomenon of peptic ulcers**

**Table of Contents**

[Table S1: List of 6 articles to explain all the 15 characteristics and 81 observations/phenomena of peptic ulcers 2](#_Toc126597610)

[Table S2: Index of 7 elucidated characteristics of peptic ulcers 3](#_Toc126597611)

[Table S3: Index of 6 elucidated duodenal ulcer-related observations/phenomena 5](#_Toc126597612)

[Table S4: Index of 9 elucidated gastric ulcer-related observations/phenomena 6](#_Toc126597613)

[Table S5: Index of 26 elucidated both gastric and duodenal ulcer-related observations/phenomena 7](#_Toc126597614)

[Table S6: Index of 30 elucidated *H. pylori*-related observations/phenomena 11](#_Toc126597615)

# Table S1: List of 6 articles to explain all the 15 characteristics and 81 observations/phenomena of peptic ulcers

| **Article** | **Article Title/Topics** |
| --- | --- |
| **A1** | The Hyperplasia and Hypertrophy of Gastrin and Parietal Cells Induced by Chronic Stress Explain the Pathogenesis of Duodenal Ulcers  **Published on Journal of Mental Health & Clinical Psychology (2022) 6(3): 1-12.**  https://doi.org/10.29245/2578-2959/2022/3.1257 |
| **A2** | A Novel Psychopathological Model Explains the Pathogenesis of Gastric Ulcers  **Published on Journal of Mental Health & Clinical Psychology (2022) 6(3): 13-24.**  https://doi.org/10.29245/2578-2959/2022/3.1259 |
| **A3** | Painting a Complete Picture of the Pathogenesis of Peptic Ulcers  **Published on Journal of Mental Health & Clinical Psychology (2022) 6(3): 32-43.**  https://doi.org/10.29245/2578-2959/2022/3.1261 |
| **A4*** | Novel Data Analyses Explain the Birth-Cohort Phenomenon of Peptic Ulcers |
| **A5** | Novel Data Analyses Explain the Seasonal Variations of Peptic Ulcers |
| **A6** | Novel Data Analyses Address the African Enigma and the Controversies Surrounding the Roles of *Helicobacter Pylori* in Peptic Ulcers |

**Note:** **1.** A1: Article 1. **2.** * This article. **3.** The 6 articles altogether explained all of the 15 characteristics and 81 observations/phenomena of peptic ulcers, and resolved all the controversies (such as H. pylori-related) and mysteries associated with the disease. **4.** The order and titles of the final published articles may be modified during the publication process.

# Table S2: Index of 7 elucidated characteristics of peptic ulcers

| Classification | Characteristics | Explanation in the Article | Article, Page, Column & Line # |
| --- | --- | --- | --- |
| General (3) | 1) Genetic predisposition | Individuals who are susceptible to gastric and duodenal ulcers belong to two genetically different populations. Notably, some individuals may have the genetic background for both gastric and duodenal ulcers and thus, they may have both types of ulcers simultaneously. | Article 2, Page 20, Left Column, Lines 14-24. |
| 2) Etiology | Peptic ulcers are not an infectious disease caused by the *H. pylori* infection, but a psychosomatic disease triggered by psychological stress. | Article 1, Page 2, Right Column, Lines 30-48. |
| 3) Epidemiology | The birth-cohort Phenomenon | Article 4 |
| Clinical symptoms (6) | 4) Predilection sites | The gastric antrum and lesser curvature have the most complicated function with the largest ganglions and the greatest density of highly developed nerve plexus, determining that the local tissues at these sites receive stronger and more frequent pathogenic nerve impulses from the CNS. | Article 2, Page 17, Right Column, Line 17-Page 18, Left Column, Line 6. |
| 5) Morphology | The shape and size of submucous nodes determine the morphology of gastric ulcers. The nodes have a clear border involving the submucosa and muscular layers, determining gastric ulcers have a sharply circumscribed loss of tissue involving the mucosa, sub-mucosa, and muscular layer. Local aggressive factors in the stomach stimulate and corrode the soft tissues around the lesion, causing contraction, denaturation and necrosis. Accordingly, gastric ulcers display a characteristic ‘punch out’ appearance with clean edges. (Figure 1A-G). | Article 2, Page 17, Left Column, Line 47-Right Column, Line 30. |
| 6) Bleeding | If large blood vessels are close to the nodes, they may rupture due to the corrosive local aggressive factors, causing bleeding. | Article 2, Page 18, Left Column, Lines 8-28. |
| 7) Perforation | A small node will not penetrate the serosa and rarely results in perforation and the symptoms are less severe. In contrast, a large node may penetrate the serosa, allowing the gastric wall to be perforated when exposed to local aggressive factors. | Article 2, Page 18, Left Column, Lines 8-28. |
| 8) Relapse | Clinical patients suffer relapses of peptic ulcers because neither anti-secretory nor anti-*H. pylori* therapy is an etiological treatment and thus, the hyperplasia and hypertrophy of gastrin and parietal cells and the impact of stress have not been eliminated. | Article 1, Page 8, Right Column, Lines 7-14. |
| 9) Multiplicity | The pathogenic nerve impulses from the CNS may affect the tissues at multiple locations in the stomach simultaneously due to the local nerve distribution, causing the multiplicity of submucous nodes in the gastric wall. Clinically, the disease manifests itself as the characteristic of multiplicity. | Article 2, Page 18, Right Column, Lines 32-39. |
| Local aggressive factors (3) | 10) Gastric acid | The hypersecretion of gastric acid is an intermediate process of duodenal ulceration, suggesting it is not a cause of duodenal ulcers, but an effect of stress triggered by personality traits or life events. Nevertheless, the hypersecretion of gastric acid is a determinant factor in the late phase of duodenal ulceration, governing many characteristics of this disease, especially the observations related to *H. pylori* and NSAIDs. | Article 1, Page 5, Right Column, Lines 15-35. |
| Gastric ulceration is determined not by gastric  acid, but by the formation of submucous nodes in the  gastric wall. Gastric acid plays a role in only the late phase of ulcerations, enlarging the local lesions, exacerbating clinical symptoms, and increasing clinical morbidity/mortality rates. | Article 2, Page 19, Left Column, Lines 2-16. |
| 11) *H. pylori* | *H. pylori* infection is not an etiological factor/a cause of duodenal ulcer, but plays a secondary role in only the late phase of duodenal ulceration, exacerbating clinical symptoms and increasing the clinical morbidity/mortality of the disease. | Article 1, Page 2, Right Column, Line 49-Page 3, Left Column, Line 17; Article 1, Page 7, Right Column, Lines 34-41. |
| *H. pylori* plays a role in only the late phase of ulcerations, enlarging the local lesions, exacerbating clinical symptoms, and increasing clinical morbidity/mortality rates. | Article 2, Page 19, Left Column, Line 18-Right Column, Line 12. |
| 12) NSAIDs | NSAIDs usage is not an etiological factor/a cause of duodenal ulcer, but plays a secondary role in only the late phase of ulceration, exacerbating clinical symptoms and increasing the clinical morbidity/mortality of the disease. | Article 1, Page 2, Right Column, Line 49-Page 3, Left Column, Line 17; Article 1, Right Column, Page 7, Lines 34-41. |
| NSAIDs are not an etiological factor of peptic ulcers in *Theory of Nodes*, but a risk factor playing a secondary role in only the late phase of peptic ulcers, exacerbating the clinical symptoms and increasing the clinical morbidity/mortality rates. | Article 2, Page 19, Right Column, Lines 14-30. |
| Prognosis (3) | 13) Self-healing | In most cases, especially in those subclinical patients, ulcers heal up automatically due to the resolution of life events. Unfortunately, the local aggressive factors in the stomach, such as gastric acid and pepsin, the infection of *H. pylori*, NSAIDs, and mechanical abrasions may delay the healing process. | Article 2, Page 18, Left Column, Lines 30-49. |
| 14) Effects of clinical treatments | The eradication of *H. pylori* would effectively cure the patients without recurrence in Cases G and I, but the eradication of *H. pylori* would not prevent the recurrence of ulcers in *H. pylori*-negative Cases D and F, or in the *H. pylori*-positive Cases J and R. Cases like Cases D, F, J and R explains a dramatic decrease of ulcer recurrences after *H. pylori* eradication. | Article 1, Page 8, Right Column, Lines 40-53. |
| Medications may attenuate the impact of local aggressive factors, such as inhibiting the hyper-secretion of gastric acid, eradicating *H. pylori*, increasing the resistance of the mucosa, or protecting the injured mucosa. Thus, medications may be conducive to the regeneration and rehabilitation of local tissues, and attenuate or inhibit ulcer symptoms, resulting in resolution and less medical visits. | Article 2, Page 18, Left Column, Lines 42-49. |
| 15) Hospitalization rates, morbidity, and mortality | Neither *H. pylori* infection nor NSAIDs usage is an etiological factor. Both play a secondary role in only the late phase of duodenal ulceration, exacerbating clinical symptoms and increasing clinical morbidity and mortality rates. | Article 1, Page 7, Right Column, Lines34-41. |
| Gastric acid, *H. pylori*, and NSAIDs play a role in only the late phase of ulcerations, enlarging the local lesions, exacerbating clinical symptoms, and increasing clinical morbidity/mortality rates. | Article 2, Page 18, Right Column, Lines 42-52. |

**Note:** The blank will be filled in other articles of the series.

#

# Table S3: Index of 6 elucidated duodenal ulcer-related observations/phenomena

| **Observations/phenomena** | **Explanation in the Article** | **Article, Page, Column & Line #** |
| --- | --- | --- |
| 1. No Acid, No Ulcer (*True statement for duodenal ulcer*). | The hypersecretion of gastric acid is the determinant factor in the late phase of duodenal ulceration, governing multiple characteristics of this disease, especially the observations related to *H. pylori* and NSAIDS. | Article 1, Page 5, Right Column, Lines 28-34. |
| 1. The role of gastric acid in the pathogenesis of duodenal ulcer is further supported by the relief of pain observed after neutralization or buffering of gastric contents with alkali or food. | The late phase of duodenal ulcers is a corrosive process caused by local aggressive factors. Thus, neutralization or buffering of gastric contents with alkali or food results in the relief of pain in duodenal ulcer patients. | Article 1, Page 5, Right Column, Lines 15-34. |
| 1. Doll and Jones’ survey suggested a positive correlation between stressful occupations and duodenal ulcer, a decreased incidence of ulcer among agricultural workers. | Psychosomatic factors such as hypochondriasis, a negative perception of life events, dependency, and lowered self-confidence, made ulcer patients more susceptible to stress than controls. | Article 1, Page 3, Right Column, Line 36-Page 4, Left Column, Line 9. |
| 1. Studies suggest that severe anxiety caused acid hypersecretion which, in turn, contributed to ulceration and symptoms. The fact that acid hypersecretion and symptoms abated with alleviation of stress supports this hypothesis. | The hypersecretion of gastric acid is triggered by the perception of stress via vagus nerves, and the hyperplasia and hypertrophy of gastrin and parietal cells in the early phase significantly potentiated the individual’s response to life events. | Article 1, Page 5, Left Column, Lines 37-43. |
| 1. Rates of recurrence in patients whose initial ulcers healed during conventional anti-secretory therapy range from 60 to 100 percent per year. | Neither anti-secretory nor anti-*H. pylori* therapy is an etiological treatment and thus, the hyperplasia and hypertrophy of gastrin and parietal cells and the impact of stress have not been eliminated. The pre-existing hyperplasia and hypertrophy and the perception of stress from time to time, resulting in ‘once an ulcer, always an ulcer’. | Article 1, Page 8, Right Column, Lines 7-14. |
| 1. Duodenal ulcer had higher incidence in large cities compared to rural areas in Africa since the 1950’s. | Life in large cities is more competitive and stressful than in rural areas. | Article 1, Page 4, Left Column, Lines 9-12. |

#

# Table S4: Index of 9 elucidated gastric ulcer-related observations/phenomena

| **Observations/phenomena** | **Explanation in the Article** | **Article, Page, Column & Line #** |
| --- | --- | --- |
| 7. No Acid, No Ulcer (*wrong statements for gastric ulcers*). | Gastric ulceration is determined not by gastric acid, but by the formation of submucous nodes in the gastric wall. Therefore, gastric ulcer patients can be hypo-, normo-, or hyper-secretors of gastric acid. | Article 2, Page 19, Left Column, Lines 2-16. |
| 8. In contrast to patients with duodenal ulcer, most patients with gastric ulcer are normo-secretors or hypo-secretors. Decreased acid-peptic activity in these patients suggests impaired mucosal defence. | Gastric ulceration is determined not by gastric acid, but by the formation of submucous nodes in the gastric wall. Therefore, gastric ulcer patients can be hypo-, normo-, or hyper-secretors of gastric acid, and it is the pre-existed submucous nodes that account for the impaired mucosal defence. | Article 2, Page 19, Left Column, Lines 2-16. |
| 9. Gastric ulcer is a sharply circumscribed loss of tissue involving the mucosa, submucosa, and muscular layer and a characteristic “punch out” appearance with clean edges, as if it were cut by a knife. | The shape and size of submucous nodes determine the morphology of gastric ulcers. The nodes have a clear border involving the submucosa and muscular layers. As a result, gastric ulcers have a sharply circumscribed loss of tissue involving the mucosa, sub-mucosa, and muscular layer. Local aggressive factors in the stomach stimulate and corrode the soft tissues around the lesion, causing contraction, denaturation and necrosis. Accordingly, gastric ulcers display a characteristic ‘punch out’ appearance with clean edges, as if it were cut by a knife. | Article 2, Page 17, Right Column, Lines 19-30. |
| 10. Gastric ulcers can be induced only in 8-30% of mouse models. | In addition, gastric ulcer can be induced only in specially bred rat strains, reflecting the impacts of heredity on the occurrence of the disease. In *Theory of Nodes*, heredity determines that gastric ulcers can be induced only in 8-30% of mouse models. | Article 2, Page 20, Left Column, Lines 14-27. |
| 11. Gastric ulceration begin in the mucosa and extend into the wall of the stomach. | Wrong statement. Gastric ulcers are not penetrating lesions beginning in the mucosa and extending into the wall of the stomach, but are ‘primed’ by the necrotic tissues (nodes) pre-existing within the gastric wall, which make the mucosa highly susceptible to the local aggressive factors. | Article 2, Page 18, Left Column, Lines 19-28. |
| 12. Stress-related gastric lesions are ‘brain-driven’ events that may be more effectively managed through central manipulations than by altering local, gastric factors. For example, stimulation or lesions of the central nucleus of the amygdala produced or reduced gastric ulcers, respectively. | The consequence of psychological stress in gastric ulcers is the abnormal release of neurotransmitters in the CNS, leading to the transmission of pathogenic nerve impulses to the stomach.  Notably, in *Theory of Nodes*, what *Nerve theory* discovers is the intermediate phase of peptic ulcerations (Please refer to A1). | Article 2, Page 16, Left Column, Line 23-Right Column, Line 18. |
| 13. Development of gastric ulcers elicited by cold stress was significantly decreased by i.p. pre-treatment with EDTA or a-methyl tyrosine, which depleted neurotransmitters. Gastric ulcers were significantly increased by pre-treatment with CaCl2. | The consequence of psychological stress in gastric ulcers is the abnormal release of neurotransmitters in the CNS, leading to the transmission of pathogenic nerve impulses to the stomach. EDTA is a sequestering agent for removing a neurotransmitter, Ca2+; α-methyl tyrosine is a competitive inhibitor for tyrosine in the production of noradrenaline and dopamine. Pre-treating animals with EDTA or α-methyl tyrosine-controlled stress-induced gastric ulcers by reducing neurotransmissions. | Article 2, Page 16, Left Column, Line 23-Right Column, Line 18. |
| 14. The predilection sites of gastric ulcers are gastric antrum and lesser curvature. | The gastric antrum and lesser curvature have the most complicated function with the largest ganglions and the greatest density of highly developed nerve plexus. Thus, the gastric antrum and lesser curvature are the predilection sites of gastric ulcers. | Article 2, Page 17, Right Column, Line 41-Page 18, Left  Column, Line 6. |
| 15. Vulnerability to gastric ulceration is modulated by psychologically meaningful experiences. Repeated stress of the same type generally, but not exclusively, provides some degree of protection against ulcer during the second or later exposures. | Peptic ulcer is a psychosomatic disease triggered by psychological stress, indicating that the perception of stress determines if life events cause ulcer diseases. After repeated exposure to the same stressful life events, the individual may be mentally prepared and respond calmly without the perception of stress. Thus, psychologically meaningful experiences can modulate the vulnerability to gastric ulcers and provides some degree of protection against ulcer during the second or later exposures. | Article 2, Page 18, Right Column, Lines  22-39. |

#

# Table S5: Index of 26 elucidated both gastric and duodenal ulcer-related observations/phenomena

| **Observations/phenomena** | **Explanation in the Article** | **Article, Page, Column & Line #** |
| --- | --- | --- |
| 16. The pathogenesis of NSAID-induced peptic ulcers is complex and multi-factorial. | A statement based on a wrong etiology. Since NSAIDs usage is not an etiological factor of peptic ulcers, the etiology based on NSAIDs has inevitably led to controversies and challenges in the field, and the classification of peptic ulcers based on *H. pylori* and NSAIDs does not help to elucidate the pathogenesis of peptic ulcers, but make the pathogenesis of NSAIDs-induced peptic ulcers ‘complex’ or ‘multi-factorial’. | Article 2, Page  19, Right column, Lines 45-51. |
| 17. 14% of patients taking NSAIDs chronically can be found to have lesions described as gastric ulcers and 10% have lesions describes as duodenal ulcers. | In duodenal ulcer, it is the hyper-secretions of gastric acid that determines if NSAIDs usage induces duodenal ulcerations, whereas in gastric ulcer it is the pre-existed submucous nodes that determine if NSAIDs usage induces gastric ulcerations. Only the NSAIDs users with the hypersecretion of gastric ulcers or the pre-existed submucous nodes can become duodenal or gastric ulcer patients. | Article 2, Page  19, Right Column,  Lines 14-30. |
| 18. Birth-cohort Phenomenon: the mortality rate of gastric ulcers in England and Wales increased at the beginning of the 20th century, reached a peak and then began to fall in the early 1950s. They also found similar trends for duodenal ulcers but followed approximately five years behind. | Psychological stress induced by the First World War accounts for the increasing mortality rates in the early 1910s. The high mortality rates between 1910s and 1940s were maintained by a succession of crucial social events that led to extensive psychological stress in the population. The end of the Second World War and continuous improvements in living conditions and sociopolitical environment explained the fall in the early 1950s and afterwards. | Article 4 |
| 19. Once an ulcer, always an ulcer. | Clinical patients suffer relapses of peptic ulcers because neither anti-secretory nor anti-*H. pylori* therapy is an etiological treatment and thus, the hyperplasia and hypertrophy of gastrin and parietal cells and the impact of stress have not been eliminated. The pre-existing hyperplasia and hypertrophy and the perception of stress from time to time, resulting in ‘once an ulcer, always an ulcer’. | Article 1, Page 8, Right Column, Lines 7-14. |
| 20. Seasonal occurrence of peptic ulcer diseases. |  |  |
| 21. Patients free of ulcer distress for long periods of time were subjected to emotional trauma and feelings of insecurity during the symptom-free intervals. | For individuals with specific personality traits, even trivialities may cause severe impacts and they are more susceptible to life events. Some patients not subject to crucial life events may still suffer gastric ulceration due to personality traits that cause emotional trauma and feelings of insecurity. Long-term effects from past crucial events and specific personality traits explain the relapse of some individuals without suffering immediate crucial events. | Article 2, Page  18, Right Column, Lines 10-15. |
| 22. Investigations of the effects of perceived stress on physiological parameters are scarce and the findings are often conflicting. | Questionnaire-based epidemiological surveys may have discounted many chronic stressors during peptic ulcer research, and that the essential methodology to study psychosocial factors (the abstract essence of the human body) have not been established in modern medicine. | Article 1, Page 5, Left Column, Line 44-Page 6, Right Column, Line 13. |
| 23. There is no definitive study proving a causal relationship between psychological stress and the development of ulcer disease. | 1. Without the CCR, there is no benchmark to identify the cause of ulcer disease.  2. without the methodological concepts derived from the CCR, much invaluable historical data is deemed outdated and remains unanalyzed. | Article 1, Discu, Page 9, Left Column, Lines 43-53;  Article 1, Discu, Page 9, Right Column, Lines 19-43. |
| 24. Feldman’s multidimensional case-controlled study found that ulcer patients exhibited significantly more emotional distress in the form of depression and anxiety. Hypochondriasis, a negative perception of their life events, dependency, and lowered self-confidence were the four variables that best discriminated ulcer patients from controls. | Peptic ulcers are a psychosomatic disease triggered by psychological stress. psychosomatic factors made individuals susceptible to psychological stress caused by current life events, leading to peptic ulceration. | Article 1, Page 2. Right Column, Lines 30-48. |
| 25. Peptic ulcers are a rare disease in childhood. | Most children do not comprehend the gravity of life events or how the events affect them in the future. Major life events and psychological distress during childhood and adolescence might differ in some fundamental ways from adulthood. Children are comfortable in their own skin and not as effected by social expectations. Their different feelings and mindset, as compared to adults suggest they experience less stress, resulting in the rarity of peptic ulcers in children. | Article 3, Page 35, Left Column, Lines 1-13. |
| 26. Although gastric ulcer and duodenal ulcer share something in common, they are believed to be different diseases. | Individuals who are susceptible to gastric and duodenal ulcers belong to two genetically different populations. **Table-1** fully elucidated the similarity and differences between duodenal and gastric ulcers. | Article 2, Page 20, Left Column, Lines 6-27. |
| 27. The final stage of ulceration is a corrosive rather than an infectious process. | The late phase of duodenal ulcers is a corrosive process caused by local aggressive factors, including gastric acid and pepsin, *H. pylori*, mechanical abrasion, and chemical erosion from medications such as NSAIDs. | Article 1, Page 5, Right Column, Lines 15-34. |
| 28. The gastric acid secretion of duodenal ulcer patients is much higher than a normal person, but only 7–8.5% of the duodenal ulcer patients are suffering from gastric ulcer simultaneously. | Gastric ulceration is determined not by gastric acid, but by the formation of submucous nodes in the gastric wall. Therefore, gastric ulcer patients can be hypo-, normo-, or hyper-secretors of gastric acid. Some individuals may have the genetic background for both gastric and duodenal ulcers and thus, they may have both types of ulcers simultaneously. | Article 2, Page 19, Left Column, Lines 2-16. |
| 29. Severe emotional stress may contribute to ulcer perforation and bleeding in some patients. | The degree to which individuals suffer negative impacts from life events determined the size and depth of the nodes. A moderate stress causes small and superficial ulcers, but severe emotional stress may cause ulcer perforation and bleeding. | Article 2, Page 18, Left Column, Lines 19-28. |
| 30. Many uncomplicated lesions heal in spite of the presence of acid gastric content, as shown by the “spontaneous” remissions of the disease and by the healed scars found at x-ray and at autopsy; however, the healing of peptic ulcer is much more rapid when the lesion is protected from the action of acid gastric juice. | The impacts of the pathogenic nerve impulses are relieved at the ulcerated location once the distal ends of the nerves necrotize. As a result, gastric ulcers may heal up automatically via the regeneration of local tissues without treatment. Medications may attenuate the impact of local aggressive factors, such as inhibiting the hyper-secretion of gastric acid, eradicating *H. pylori*, increasing the resistance of the mucosa, or protecting the injured mucosa. Thus, medications may be conducive to the regeneration and rehabilitation of local tissues, and attenuate or inhibit ulcer symptoms, resulting in resolution and less medical visits. | Article 2, Page 18, Left Column, Lines 30-49. |
| 31. Autopsy reports showed: 20%-29% of males and 11%-18% of females were found to have suffered from ulcers in the past or present. | Heredity is an innate factor playing a baseline role in peptic ulcers, which predisposes a proportion of individuals in the population to an ulcer personality. Thus, not all the individuals suffer peptic ulcers.  From the 1900’s to the 1950’s, men were often the direct participants of various social conflicts such as wars and financial crisis, and they were more likely to bear economical pressures than women, explains a higher percentage of males (20-29%) have suffered from ulcers in the past or at present than females (11-18%) in autopsy reports. | Article 3, Page 37,  Right Column, L12-27;  Article 3, Page 37,  Right Column, Lines  41-52. |
| 32. It is believed that, not only should the prognosis and assessment of ulcer have mental assessment, but the treatment without mind adjustment is also incomplete. | A complete cure of peptic ulcers depends on the resolution of life events and/or the resolution of mental health concerns;  Promoting social harmony and mind adjustment are essential etiological therapy for a complete cure of peptic ulcers without relapse. | Article 3, Right  Column, Page 38,  Lines 2-7;  Article 3, Page 39, Left Column, Lines 35-43. |
| 33. Peptic ulcer patients may have “ulcer personality”, such as immaturity, impulsivity, and feelings of social isolation and alienation. | Heredity is an innate factor playing a baseline role in peptic ulcers, which predisposes a proportion of individuals in the population to an ulcer personality. | Article 3, Page 37, Right Column, Lines 12-27. |
| 34. In a 2-year study of Pima Indians, Hesse did not find any peptic ulcer disease. |  |  |
| 35. In contrast to Pima Indians, 10% of Caucasians develop peptic ulcers. |  |  |
| 36. To date, no consistent pattern of factors, in either host or organism, has been identified that successfully predicts which infected persons will subsequently have ulcer disease. | According to the complete picture painted in this Article 3, the occurrence of peptic ulcers is predictable if the 4 preconditions are satisfied: heredity; Hyperplasia and hypertrophy in the stomach and/or a negative *life-view*, psychological stress, H. pylori infection and NSAIDs usage | Article 3, Page 37,  Right Column, Line  1-Page 38, Left  Column, Line 41. |
| 37. The relationship between life events stress, psychological factors and peptic ulcer diseases is not clearly established at the present time and warrants further study. | Without the CCR, there is no benchmark to identify the cause of disease. As a result, no disease has been fully understood. Without the CCR, the methodologies essential for data analysis have never been established, resulting in many unsolved mysteries and massive challenges. | Article 1, Discu, Page 9, Left Column, Lines 43-53;Article 1, Discu, Page 9, Right Column, Lines 19-43. |
| 38. Richard emphasized the different aetiology of gastric and duodenal ulcers and persons with gastric and duodenal ulcers differ epidemiologically, behaviourally, and genetically. | Table 1 listed all the commonalties and differences between duodenal and gastric ulcers. | Article 2, Page 20, Table 1. |
| 39. Gastric ulcer was more frequent than duodenal ulcer, 4G:1D in 1900 versus 10D:1G currently. More women than men had the disease, but now it has become reversed; from 3F:1M to 4M:1F for gastric ulcer and 10M:1F for duodenal ulcer. | These reversions are due to the profound changes in social environments during the past century. The reversion of the sex ratio can be explained by the liberation and improved social status for women. The civilization and urbanization, etc. result in the reversion of gastric: duodenal ratio. Before 1900, the life threats or survival-related challenges and the severe shortages of supplies for the majority determined the majority of peptic ulcer cases were gastric ulcer patients. However, after 1900, especially after World War II, most of the threats to survival disappeared and the steady growth of people's living standard lead to the decreased incidence of gastric ulcers, whereas the fast rhythm of modern life, fierce social competition, and unhealthy life style, etc. primarily induce duodenal ulcers. | Article 3, Page 34, Left Column, Line 33-Right Column, Line 11. |
| 40. Stress ulcers in the rat are primarily gastric rather than duodenal, the latter typically requiring additional artificial chemical potentiation (e.g., histamine). | It may take ~5 years to induce the hyperplasia and hypertrophy in the human body. As a result, it is hard to duplicate this chronic pathophysiological process in the lab, thereby making it difficult to establish animal models for stress-induced duodenal ulcers.  Duodenal ulcer is a chronic disease associated with the individual’s daily behaviors, and multiple psycho-neuro-endocrine organs were involved. Thus, stress-induced duodenal ulcer is hardly reproduced in animal models due to short lifespans. | Article 1, Page 5, Left Column, Lines 14-20;  Article 1, Discu, Page 9, Left Column, Lines 15-20. |
| The psychological stress triggering gastric ulcers is usually short-term and acute. This kind of stress can be simulated in labs and therefore, stress-induced ulcers in labs are usually gastric ulcers. | Article 2, Page 16, Left Column, Lines 2-11. |
| 41. Many ulcer patients and some physicians believe that symptomatic exacerbations of peptic ulcer disease occur during or shortly after stressful events. | Peptic ulcers are a psychosomatic disease triggered by psychological stress. psychosomatic factors made individuals susceptible to psychological stress caused by current life events, leading to peptic ulceration. | Article 1, Page 2, Right Column, Lines 30-48. |
| 42. Mental disorders (or stress) are associated with increased rates of peptic ulcer diseases. | Peptic ulcers are a psychosomatic disease triggered by psychological stress. psychosomatic factors, which focuses more on the impact of mental health related to past life experience, made individuals susceptible to psychological stress caused by current life events, leading to peptic ulceration. | Article 1, Page 2, Right Column, Lines 30-48. |
| 43. The spontaneous remissions and relapses of peptic ulcers have never been explained. | Clinical patients suffer the relapse of peptic ulcers, because neither anti-secretory nor anti-*H. pylori* therapy is an etiological treatment and thus, the impact of stress caused by personality traits or negative life events has not been eliminated. Chronic stress-induced hyperplasia and hypertrophy of gastrin and parietal cells are the crux of duodenal ulcer issue, determine the spontaneous remissions and relapse of duodenal ulcer, but this psychopathological mechanism has never been elucidated in modern medicine.  *The etiology of peptic ulcer has never been identified, causing the problem.* | Article 1, Page 8, Right Column, Lines 7-14; Article 1, Discu, Page 9, Left Column, Lines 15-26. |
| 44. The pathophysiology of peptic ulcer has centred on an imbalance between aggressive and protective factors. | The mechanisms of diabetes and cardiomegaly suggest that the origins of disease and the pathological changes could present in different organs. Therefore, the traditional etiological concept (The pathophysiology of peptic ulcer has centred on an imbalance between aggressive and protective factors) is not sufficient to discover the cause of disease, and peptic ulcers may not be a local disease, but a general disease due to abnormalities in other parts of the human body. | Article 3, Page 33,  Right Column, Lines 4-24. |
| 45. No single theory in history could fully explain the pathogenesis of peptic ulcers. | Each of the single theory focused on only one area of the human body, and there is no holistic review of peptic ulcers before. Without the CCR, there is no benchmark to identify the true cause of disease. In addition, without the CCR, the methodologies for data analysis have never been established. Although each of the historical theory did make important discoveries and proved useful to understand peptic ulcers, they were overshadowed by the discovery of *H. pylori*. | Article 1, Page 3, Left Column, Lines 20-29;  Article 1, Discu, Page 9, Left Column, Lines 43-53; Article 1, Discu, Page 9, Right Column, Lines 19-43. |

#

# Table S6: Index of 30 elucidated *H. pylori*-related observations/phenomena

| **Observations/phenomena** | **Explanation in the Article** | **Article, Page, Column & Line #** |
| --- | --- | --- |
| 46. African Enigma: The *H. pylori* infection rate is high (close to 100%) throughout Africa, but the prevalence of duodenal ulcer varied in different parts of the continent. |  |  |
| 47. Only the presence of duodenal ulcers, and not gastric ulcers, was associated with increasing *H. pylori* density. The association between gastric ulcers and *H. pylori* infection is less clear. | Since each of the 3 local aggressive factors partially contributes to the corrosive intensity, and duodenal ulceration is caused by the total corrosive intensity, the higher the density of *H. pylori*, the higher total corrosive intensity. As a result, the infection of *H. pylori* exacerbates clinical symptoms and increases the clinical morbidity/mortality of the disease. Cases B to J explain why *H. pylori* density is associated with the morbidity rate of duodenal ulcers. | Article 1, Page 7, Right Column, Lines 34-48. |
| In gastric ulcers, it is not the total corrosive intensity of local aggressive factors, but the formation of submucous nodes that determines the occurrence of gastric ulcers. Therefore, *H. pylori* has a dose-effect on only duodenal ulcers, whereas gastric ulcers’ association with *H. pylori* is less clear. | Article 2, Page 19, Right Column, Lines 3-12. |
| 48. Only 27% of symptomatic children with peptic ulcers were *H. pylori* positive. |  |  |
| 49. 48% of patients developed ulcers within six months of healing, but the re-infection rate after eradication was very low (<2%). |  |  |
| 50. In developing countries with uniformly high prevalence of *H. pylori* infection, there are marked regional differences in the prevalence of duodenal ulcers, which could not be explained by the more toxic CagA and VacA *H. pylori* strains. | *H. pylori* infection is not the cause of duodenal ulcers but plays a secondary role in only the late phase of ulceration and thus, *H. pylori* strains such as CagA, VacA, and SecA cannot explain the higher prevalence of duodenal ulcers. | Article 1, Page 8, Left Column, Lines 2-16. |
| 51. In the countries with low prevalence of *H. pylori*, 30%-40% or more of duodenal ulcer patients are *H. pylori-*negative, and the absence of *H. pylori* infection in early cases of duodenal ulcers was also reported. | *H. pylori* infection is not the cause of duodenal ulcers but plays a secondary role in only the late phase of ulceration.  Cases D, F, L, and N support the finding that in some countries, 30%-40% of duodenal ulcer 386 patients were *H. pylori*-negative and explain a clinical observation that up to 35% of 387 infected patients failed to respond to standard anti-*H. pylori* therapy. | Article 1, Page 8, Left Column, Lines 2-16;  Article 1, Page 8, Right Column, Lines 19-27. |
| 52. The role of *H. pylori* in peptic ulcers is controversial. | Without the CCR, there is no benchmark to identify the cause of disease, and the methodologies essential for data analysis have never been established, resulting in many unsolved mysteries and massive challenges. No longer controversial after the application of the CCR. | Article 1, Discu, Page 9, Left Column, Lines 43-53; Article 1, Discu, Page 9, Right Column, Lines 19-43. |
| 53. ‘*H. pylori* is the most important aetiological factor so far described for duodenal ulcer’. | *This is a wrong statement.* The hyper-secretion of gastric acid is a determinant factor in the late phase of duodenal ulceration; Administering cysteamine or propionitrile, which effectively stimulates the hypersecretion of gastric acid in rats, can induce acute and chronic duodenal ulcers in normal rats, whereas the inoculation of *H. pylori* alone cannot, suggesting it is not *H. pylori* but gastric acid that plays a primary/decisive role in the pathogenesis of duodenal ulcers. | Article 1, Page 5, Right Column, Lines 36-52. |
| 54. How *H. pylori* infection can lead to ulceration is unknown. | *This statement is based on a wrong assumption.* Without the hypersecretion of gastric acid, the corrosive intensity caused by either *H. pylori* or NSAIDs could not reach the threshold of ulceration. *H. pylori* alone cannot lead to ulceration and thus, the etiology based on *H. pylori* infection would never be able to explain peptic ulcerations. | Article 1, Page 7, Right Column, Lines 44-53. |
| 55. No *H. pylori*, No Ulcer; peptic ulcer is an infectious disease. | *These are wrong statements.* Neither *H. pylori* infection nor NSAIDs usage is essential for ulceration. Therefore, duodenal ulcers may occur in the absence of *H. pylori* and/or NSAIDs, leading to idiopathic (*H. pylori*-negative and non-NSAIDs user) ulcer patients. | Article 1, Page 5, Right Column, Lines 38-48. |
| 56. In spite of a high prevalence of *H. pylori* infection worldwide, the incidence of duodenal ulcer disease in both adults and children is low in comparison. | Case B is applicable to most *H. pylori* infected individuals, but only those also impacted by the hyper-secretions of gastric acid due to psychological stress (Case G) will have the chance to become ulcer patients. | Article 1, Page 8, Left Column, Lines 17-23. |
| 57. Kato and colleagues’ retrospective analysis found that *H. pylori* prevalence in gastric ulcer did not reach 50%; they concluded while *H. pylori* infection appears to be a risk factor in gastric ulcer, other causes are responsible for most cases. Only 56-96% of gastric ulcer patients are *H. pylori-*positive, so other factors must be involved. | The formation of submucous nodes is irrelevant to *H. pylori* infection, but determined by only the pathogenic nerve impulses from the CNS. Without infection, gastric ulcers may occur if the individual is severely impacted by psychological stress. Therefore, more than 50% of clinical gastric ulcer patients can be *H. pylori*-negative. The pre-existed pathological lesions in the gastric wall due to psychological stress account for the other unidentified factors. On the other hand, because gastric ulceration is determined not by *H. pylori* infection, but by the formation of submucous nodes induced by psychological stress, even though the infection rate in the population is as high as 90%, only the individuals affected by psychological stress become ulcer patients, leading to the low incidence of gastric ulcers despite a high prevalence of *H. pylori* infection. | Article 2, Page 19, Left Column, Lines 32-49. |
| 58. Despite the fall in prevalence of *H. pylori* infection, the attributable risk of *H. pylori* infection in peptic ulcer disease has not changed. | Since *H. pylori* infection is not the cause of peptic ulcers, the attempt to explain an epidemiological observation by *H. pylori* infection would inevitably result in the inconsistency. | Article 2, Page 19, Left Column, Line 49-Right Column, Line 2. |
| 59. There was a significantly higher incidence of idiopathic duodenal ulcers in the younger generation. | The younger the individuals, the less chances they get infected with *H. pylori* and/or become a NSAIDs users, resulting in the significantly higher incidence of idiopathic [peptic] duodenal ulcers in the younger generation. | Article 2, Page 19, Right Column, Line 51-Page 20, Left  Column, Line 3. |
| 60. There are basically three different types of peptic ulcer: *H. pylori*-related peptic ulcer; NSAID-related peptic ulcer; and non-*H. pylori*, non-NSAID ulcer. | *This classification is because the cause of peptic ulcers has never been not identified in modern medicine.* This classification overlooks the primary/decisive factor in the occurrence of duodenal ulcers, the hypersecretion of gastric acid. | Article 1, Page 8, Right Column, Lines 14-18. |
| 61. A relatively isolated group of Australian aboriginals have virtually no *H. pylori* infection and hardly any peptic ulcer disease. |  |  |
| 62.Up to 20% of patients with ulcers suffer a relapse of ulcer disease despite successful eradication of their infections, suggesting that *H. pylori* was not the cause of their original ulcers. | Cases D and F were caused simply by the hypersecretion of gastric acid due to psychological stress, which explain 20%-40% of patients with idiopathic ulcers (*H. pylori*-negative and non-NSAIDs user) and the eradication of *H. pylori* can not prevent the relapse of these cases. | Article 1, Page 8, Left Column, Lines 42-46. |
| 63. Difference in virulence of *H. pylori* strains (cag- and cag+) has been considered as a putative explanation as to why only a minority of infected population develop peptic ulcers. | *H. pylori* infection is not the cause of duodenal ulcers but plays a secondary role in only the late phase of ulceration and thus, *H. pylori* strains such as CagA, VacA, and SecA, cannot explain the higher prevalence of duodenal ulcers. | Article 1, Page 8, Left Column, Lines 2-16. |
| 64. *H. pylori* infection in rats was successful and was accompanied by a mild to moderate mucosal inflammation. After *H. pylori* inoculation, an ulcer was induced in the oxyntic mucosa of both infected and uninfected rats by exposing the serosal side to acetic acid. | For those individuals with severe hyperplasia and hypertrophy of gastrin and parietal cells, the hypersecretion of gastric acid alone is sufficient to induce duodenal ulcerations. In that case, neither *H. pylori* infection nor NSAIDs usage is essential for ulceration. Therefore, duodenal ulcers may occur in the absence of *H. pylori* and/or NSAIDs, leading to idiopathic (*H. pylori*-negative and non-NSAIDs user) ulcer patients. Administering cysteamine or propionitrile, which effectively stimulates the hypersecretion of gastric acid in rats, can induce acute and chronic duodenal ulcers in normal rats, whereas the inoculation of *H. pylori* alone cannot, further indicating that gastric acid plays a more important role than *H. pylori* in duodenal ulcerations. | Article 1, Page 5, Right Column, Lines 36-52. |
| 65. More than 95 percent of patients with duodenal ulcers and more than 80 percent of patients with gastric ulcers are infected with *H. pylori*. |  |  |
| 66. The corresponding ulcer areas in the *H. pylori*-infected rats were significantly larger in the infected than in the uninfected rats, and ulcer healing was delayed in the infected rats. Eliminating *H. pylori* accelerates the healing of ulcer. | Only after the submucous nodes have come into being, could *H. pylori* have the chance to corrode the tissues at the site, enlarging the lesions and delaying the regeneration and rehabilitation of local tissues. Eradicating *H. pylori* attenuates the impact of local aggressive factors, is conducive to the regeneration and rehabilitation of local tissues, and attenuate or inhibit ulcer symptoms, resulting in resolution and less medical visits. | Article 2, Page 19, Left Column, Lines 18-31;  Article 2, Page 18, Left Column, Lines 42-49. |
| 67. Eradication of *H. pylori* in gastric ulcer patients has also been shown to be associated with a significant reduction in ulcer relapse rate, compared with those who remain infected. | Medications, such as proton pump inhibitors for gastric acid reduction and antibiotics for *H. pylori* eradication, may mitigate symptoms, reduce the morbidity rate, and delay relapse to a certain degree, and many cases were diagnosed as healed, but the real cause of gastric ulcers, psychosocial stress, was not removed. As a result, relapse may occur during treatments. | Article 2, Page 18, Right Column, Lines 3-10. |
| 68. Clinical data reported that the recurrence rate is as high as 74-80% in *H. pylori* positive group of duodenal ulcer patients who have healed, but the negative group is only 0-28%. The discrimination was remarkable. | The eradication of *H. pylori* would effectively cure the patients without recurrence in Cases G and I, which are representative of most clinical patients. However, the eradication of *H. pylori* would not prevent the recurrence of ulcers in *H. pylori*-negative Cases D and F, or in the *H. pylori*-positive Cases J and R, where the damage caused by the bacterium was not a determinant factor in ulceration. It is more common to identify cases similar to Cases G and I in clinical patients, whereas cases like Cases D, F, J and R occur less frequently, which explains the dramatic decrease of ulcer recurrences after *H. pylori* eradication. | Article 1, Page 8, Right Column, Lines 40-53. |
| 69. A negative interaction between *H. pylori* and NSAIDs on duodenal ulcers suggests that *H. pylori* reduces the development of ulcers in NSAIDs users. | *H. pylori* upregulates the expression of COX-2 and subsequently results in the biosynthesis of gastroprotective prostaglandin, which in turn offsets the corrosive intensity of NSAIDs and thus is conducive to the healing of NSAIDs-induced ulcers, causing ‘*H. pylori* reduces the development of ulcers in NSAIDs users’. | Article 1, Page 7, Left Column, Lines 46-52. |
| 70. ~20% of peptic ulcers in the Polish population are unrelated to *H. pylori* and NSAIDs use (idiopathic ulcers). | For individuals with severe hyperplasia and hypertrophy of gastrin and parietal cells, the hypersecretion of gastric acid alone is sufficient to induce duodenal ulcerations. In that case, neither *H. pylori* infection nor NSAIDs usage is essential for ulceration. Therefore, duodenal ulcers may occur in the absence of *H. pylori* and/or NSAIDs, leading to idiopathic (*H. pylori*-negative and non-NSAIDs user) ulcer patients. | Article 1, Page 5, Right Column, Lines 36-52. |
| 71. The prevalence of *H. pylori* in patients with bleeding ulcers may be 15~20% lower than in patients with non-bleeding ulcers. | Bleeding indicates patients are more likely to be seriously impacted by psychological stress with severe hyperplasia and hypertrophy of parietal and gastrin cells as Cases F and *H. pylori* infection is not essential for ulceration. In contrast, non-bleeding ulcer suggests the patients are more likely to be slightly impacted by stress with mild hyperplasia and hypertrophy, and *H. pylori* infection is essential to increase the total corrosive intensity for the induction of ulcers as Case G. As a result, clinical bleeding ulcer patients are more likely to be Case F without *H. pylori* and non-bleeding patients are more likely to be Case G with *H. pylori* Infection. | Article 1, Page 8, Left Column, Line 47-Right Colum, Line 7. |
| 72. The eradication of *H. pylori* reduces the rate of re-bleeding in patients with ulcer disease. | The eradication of *H. pylori* decreases the total corrosive intensity, causing mitigated symptoms, lowered morbidity and the rates of re-bleeding in ulcer patients. | Article 1, Page 7, Right Column, Lines 41-44. |
| 73. How *H. pylori* infection affects gastric acid secretion is still unclear. | The hypersecretion of gastric acid is unrelated to any of the local aggressive factors, such as *H. pylori* infection, NSAIDs and other medications, but potentiated by the hyperplasia and hypertrophy of one or more endocrine organs and triggered by psychological stress due to personality traits or life events. *Thus, ‘H. pylori infection affects gastric acid secretion’ is a wrong assumption.* | Article 1, Page 5, Right Column, Lines 20-35. |
| 74. The incidence of peptic ulcers was higher in *H. pylori-*infected patients than in the *H. pylori-*negative group. | Since each of the 3 local aggressive factors partially contributes to the corrosive intensity, and duodenal ulceration is caused by the total corrosive intensity, the higher the density of *H. pylori*, the higher total corrosive intensity. As a result, the infection of *H. pylori* exacerbates clinical symptoms and increases the clinical morbidity/mortality of the disease. | Article 1, Page 7, Right Column, Lines 34-41. |
| 75. Duodenal acid load determines whether *H. pylori* can cause duodenal ulcer. | The hypersecretion of gastric acid is the determinant factor in the late phase of duodenal ulceration, governing multiple characteristics of this disease, especially the observations related to *H. pylori* and NSAIDs. | Article 1, Page 5, Right Column, Lines 25-35. |
| 76. The increase in *H. pylori* density is related to the presence of duodenal ulcer disease. | Since each of the 3 local aggressive factors partially contributes to the corrosive intensity, and duodenal ulceration is caused by the total corrosive intensity, the higher the density of *H. pylori*, the higher total corrosive intensity. As a result, the infection of *H. pylori* exacerbates clinical symptoms and increases the clinical morbidity/mortality of the disease. | Article 1, Page 7, Right Column, Lines 34-41. |
| 77. *H. pylori*-negative duodenal ulcers were associated with a poorer prognosis mainly because of a higher rate of ulcer and symptom relapse. | To reach the ulceration threshold without the corrosive intensity from *H. pylori*, the hypersecretion of gastric acid needs to be higher in *H. pylori*-negative patients. The higher hypersecretion in Cases D and F indicates more severe negative impacts from psychosocial stress than in Cases G and I. Additionally, the damage from *H. pylori* can be relieved by antibiotics, as in Cases G and I, decreasing the corrosive intensity in these patients, whereas Cases D and F cannot achieve the same therapeutic effect. Therefore, there is a poorer prognosis and a higher relapse rate in *H. pylori*-negative patients. | Article 1, Page 8, Left Column, Lines 31-41. |
| 78. When *H. pylori* persisted, 61% of duodenal ulcers healed and 84% relapsed. When *H. pylori* was cleared 92% of ulcers healed and only 21% relapsed during the 12 months follow-up period. | Since each of the 3 local aggressive factors partially contributes to the corrosive intensity and duodenal ulceration is caused by the total corrosive intensity, the higher density of *H. pylori*, the higher total corrosive intensity. As a result, *H. pylori* infection exacerbates clinical symptoms and increases the clinical morbidity/mortality of the disease. In contrast, the eradication of *H. pylori* decreases the total corrosive intensity, causing mitigated symptoms, lowered morbidity and the rates of re-bleeding in ulcer patients. | Article 1, Page 7, Right Column, Lines 34-44. |
| 79. Jyotheeswaran and colleagues from greater Rochester, New York, reported a 48% prevalence of *H. pylori*-negative duodenal ulcers in white patients and 15% in non-white patients, with an overall negative prevalence of 39%. Parsonnet’s meta-analysis indicates the overall prevalence of *H. pylori*-negative duodenal ulcers is 40%. | For those individuals with severe hyperplasia and hypertrophy of gastrin and parietal cells, the hypersecretion of gastric acid alone is sufficient to induce duodenal ulcerations. In that case, neither *H. pylori* infection nor NSAIDs usage is essential for ulceration. Therefore, duodenal ulcers may occur in the absence of *H. pylori* and/or NSAIDs, leading to idiopathic (*H. pylori*-negative and non-NSAIDs user) ulcer patients. | Article 1, Page 5, Right Column, Lines 36-52. |
| 80. A review by van der Voort and colleagues suggests that existing data are consistent with a causal role for *H. pylori* in stress ulcer formation. | *A statement originated from wrong etiology. ‘A causal role for H. pylori in stress ulcer’ indicates that without stress, H. pylori alone can not induce ulcer.*  Administering cysteamine or propionitrile, which effectively stimulates the hypersecretion of gastric acid in rats, can induce acute and chronic duodenal ulcers in normal rats, whereas the inoculation of *H. pylori* alone cannot, further indicating it is not *H. pylori* but gastric acid that plays a primary/decisive role in the pathogenesis of duodenal ulcer.  Case B in **Figure 2** is applicable to most *H. pylori* infected individuals, but only those also impacted by the hyper-secretions of gastric acid due to psychological stress (Case G) will have the chance to become ulcer patients. That explained the wrong statement “a causal role for *H. pylori* in stress ulcer formation”. | Article 1, Page 5, Right Column, Lines 43-52.  Article 1, Page 8, Left Column, Lines 17-25. |
| 81. Barry Marshall drank a concoction made from cultured *H. pylori* and came down with gastritis that could be cured with antibiotics. |  |  |
